# Supplementary material
Source: MDPI journal article supplement (https://www.mdpi.com/search?q=molbank-2022-M1463)
Supplement: s002 [file molbank-2022-M1463-s002.mol]

  ACCLDraw06212208362D

  9  8  0  0  0  0  0  0  0  0999 V2000
   18.6190   -8.5582    0.0000 N   0  0  0  0  0  0  0  0  0  0  0  0
   18.0994   -8.8582    0.0000 C   0  0  0  0  0  0  0  0  0  0  0  0
   17.5798   -8.5582    0.0000 C   0  0  0  0  0  0  0  0  0  0  0  0
   17.0602   -8.8582    0.0000 C   0  0  0  0  0  0  0  0  0  0  0  0
   16.5406   -8.5582    0.0000 C   0  0  0  0  0  0  0  0  0  0  0  0
   16.0210   -8.8582    0.0000 N   0  0  3  0  0  0  0  0  0  0  0  0
   14.9826   -8.8582    0.0000 N   1  0  0  0  0  0  0  0  0  0  0  0
   15.5018   -8.5585    0.0000 C   1  0  0  0  0  0  0  0  0  0  0  0
   15.5018   -7.9590    0.0000 N   1  0  0  0  0  0  0  0  0  0  0  0
  2  1  1  0  0  0  0
  3  2  1  0  0  0  0
  4  3  1  0  0  0  0
  5  4  1  0  0  0  0
  6  5  1  0  0  0  0
  6  8  1  0  0  0  0
  8  7  1  0  0  0  0
  8  9  2  0  0  0  0
M  ISO  3   7  15   8  13   9  15
M  END
